# Supplementary material for: Climate signals in stable carbon and hydrogen isotopes of lignin methoxy groups from southern German beech trees
Source: Copernicus journal article supplement (doi:10.5194/cp-2021-135), 2021-10-20
Supplement: Supplementary file 1 [file cp-2021-135-supplement.pdf]

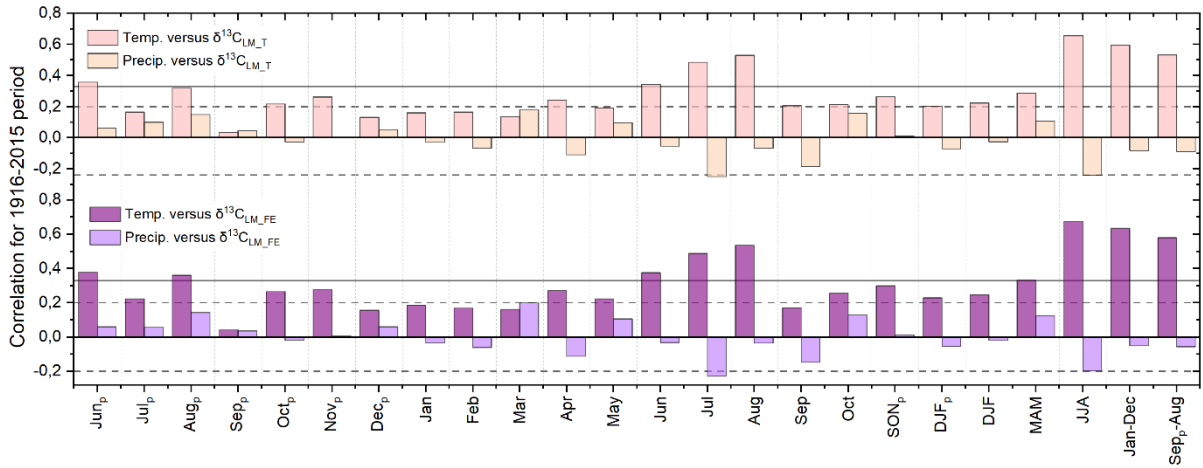

**S1. Correlation coefficients between corrected  $\delta^{13}\text{C}_{\text{LM},T}$ ,  $\delta^{13}\text{C}_{\text{LM},FE}$  chronologies and local temperatures and precipitation totals from 1916 to 2015. The subscript p indicates the months of the previous year, and horizontal lines indicate the significance levels, with solid lines representing highly significant ( $p < 0.001$ ) and dashed lines representing significant values ( $p < 0.05$ ).**

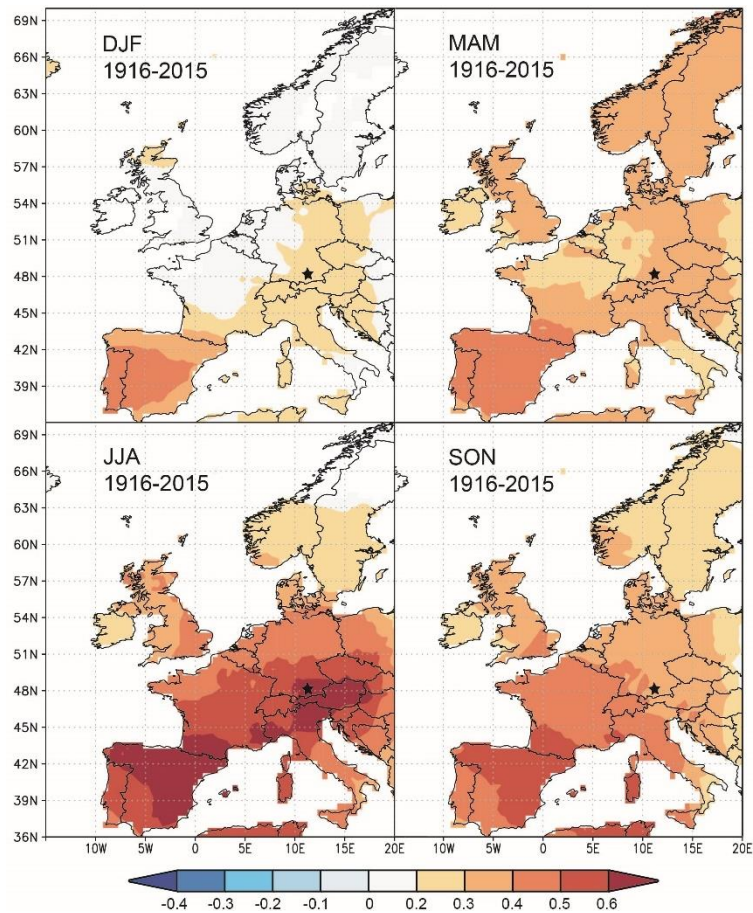

**S2. Spatial correlations between winter (DJF), spring (MAM), summer (JJA), fall (SON) temperature data (CRU TS4.04), and  $\delta^{13}\text{C}_{\text{LM},RL}$  anomalies from 1916-2015. Black star marks the Hohenpeißenberg in Germany.**

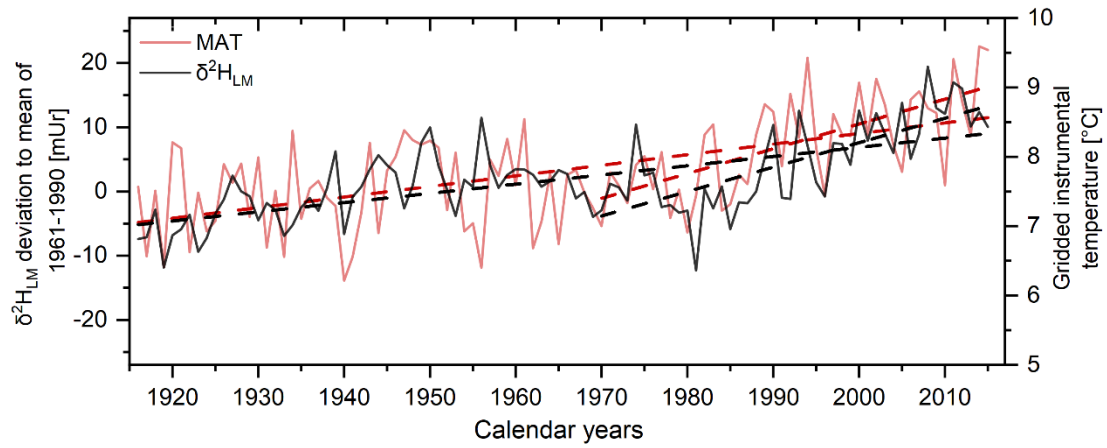

**S3. Gridded instrumental MAT and mean  $\delta^2\text{H}_{\text{LM}}$  chronology (relative to the mean value of 1961-1990) (solid lines) over the period 1916 to 2015. Linear regression lines (dashed lines) are shown for the whole period and the period from 1970 to 2015.**

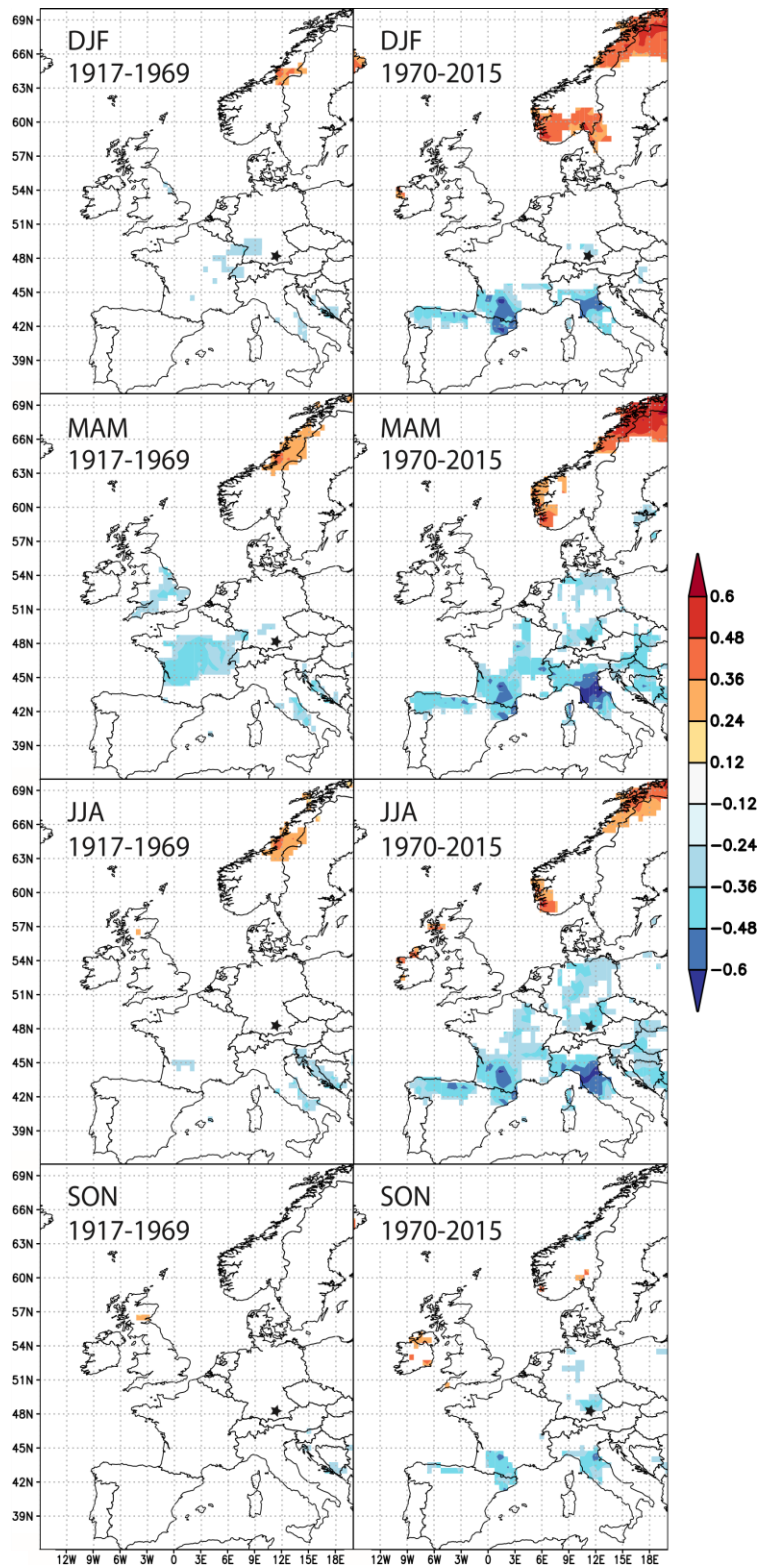

**S4. Spatial correlations between seasonal drought indices (CRU scPDSI 4.05early; Van Der Schrier et al., 2013) and  $\delta^2\text{H}_{\text{LM}}$  values (DJF: previous year December until recent year February; MAM: March, April, May; JJA: June, July, August and SON: September, October, November temperatures) for the period 1916 to 2015.**

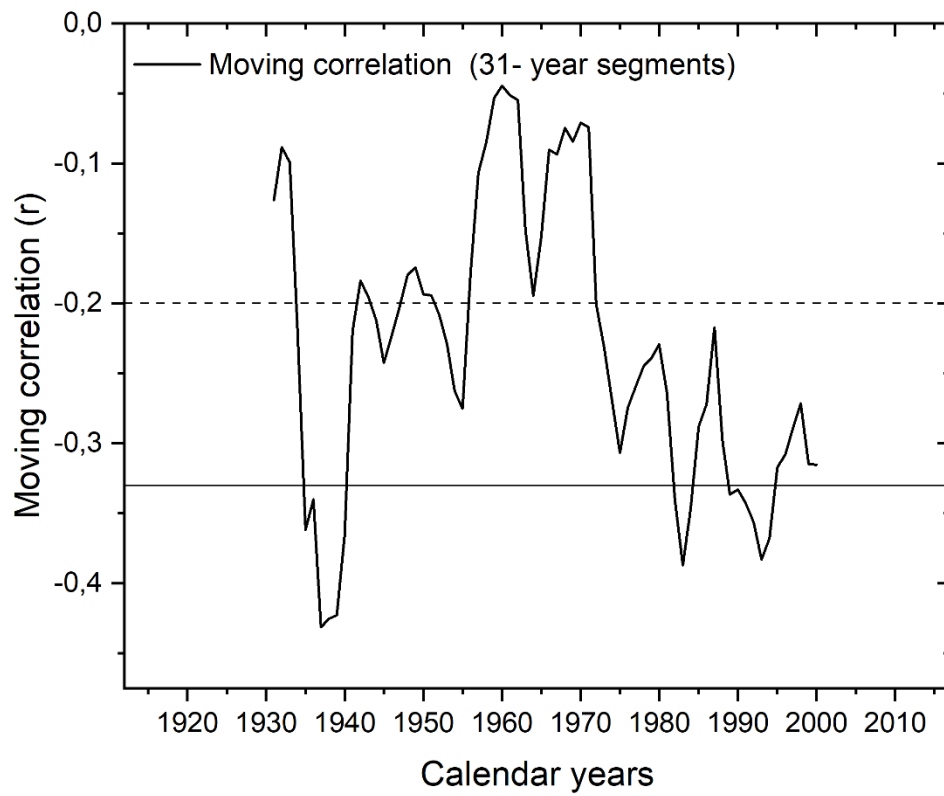

**S5. 31-year moving correlations between the seasonal drought index (CRU scPDSI 4.05early; Van Der Schrier et al., 2013) and  $\delta^2 H_{LM}$  values. The solid line represents highly significant and the dashed line significant values.**
